# Supplementary material for: Factors Associated with Fear of Falling among Community-Dwelling Older Adults in the Shih-Pai Study in Taiwan
Source: PLoS One. 2016 Mar 2;11(3):e0150612. doi: 10.1371/journal.pone.0150612 (PMC4775068; doi:10.1371/journal.pone.0150612)
Supplement: S1 Metafile — (XLSX) [file pone.0150612.s002.xlsx]

## Sheet: Metadata
Variable information
Name	Position	Label	Measure	Role	Missing			Variable
Participant number	A	(None)	Nominal	Input	999			Variable	Coding	Label
Sex	B	Sex	Nominal	Input	999			Sex	0	Female
PSQI	C	PSQI	Nominal	Input	999				1	Male
GDS	D	GDS	Nominal	Input	999			Diabetes	0	No
Education level	E	Education level	Nominal	Input	999				1	Yes
Marital status	F	Marital status	Nominal	Input	999			Hypertension	0	No
DM	G	DM	Nominal	Input	999				1	Yes
Hypertension	H	Hypertension	Nominal	Input	999			CardiovascularDisease	0	No
Cardiovascular Disease	I	Cardiovascular Disease	Nominal	Input	999				1	Yes
Stroke	J	Stroke	Nominal	Input	999			Stroke	0	No
Living status	K	Living status	Nominal	Input	999				1	Yes
Fall	L	Fall	Nominal	Input	999			Marital status	0	Single/divorced/seperated/widowed
Fear of falling	M	Fear of falling	Nominal	Input	999				1	Married
Insomnia	N	Insomnia	Nominal	Input	999			Education level	0	Illiterate
Medical help accessibility	O	Medical help accessibility	Nominal	Input	999				1	Literate
Subjective health	P	Subjective health	Nominal	Input	999			Fear of Falling	0	Not fear of falling
Physical Functioning	Q	PF	Scale	Input	999				1	Fear of falling
Role Physical	R	RP	Scale	Input	999			Living Status	0	Live alone
Bodily Pain	S	BP	Scale	Input	999				1	Not live alone
General Health	T	GH	Scale	Input	999			Medical help accessibility
Vitality	U	VT	Scale	Input	999			Help by oneself	0	Help by oneself
Social Functioning	V	SF	Scale	Input	999			Help from relatives	1	Help from relatives
Role Emotional	W	RE	Scale	Input	999			Help from public resources	2	Help from public resources
Mental Health	X	MH	Scale	Input	999			Can't get any help	3	Can't get any help
PCS	Y	PCS	Scale	Input	999			PSQI	0	<=5
MCS	Z	MCS	Scale	Input	999				1	> 5
Age-Bianry	AA	Age-Bianry	Nominal	Input	999			GDS	0	< 5
									1	>=5
								Subjective health_1
								Excellent	1	Excellent
								Very good	2	Very good
								Good	3	Good
								Fair	4	Fair
								Poor	5	Poor
								Subjective health_2
								Excellent and very good	1	Excellent and very good
								Good and fair	2	Good and fair
								Poor	3	Poor
								Age-binary	0	65-74 years
									1	>=75 years
